# 1 Dissection of intestines from larval zebrafish for molecular analysis

2

3 Bilge San<sup>1</sup>, Marco Aben<sup>1,2,†</sup>, Gert Flik<sup>3</sup>, Leonie M. Kamminga<sup>1,2\*</sup>

4

5 <sup>1</sup>Radboud University Medical Center, Radboud Institute for Molecular Life Sciences, 274 Department  
6 Molecular Biology, P.O. Box 9101, 6500 HB Nijmegen, The Netherlands, phone: +31(0)243616850, e-mail:  
7 sanbilge@gmail.com, marco.aben@radboudumc.nl, l.kamminga@science.ru.nl, <sup>2</sup>Radboud University,  
8 Faculty of Science, Radboud Institute for Molecular Life Sciences, 274 Department Molecular Biology,  
9 P.O. Box 9101, 6500 HB Nijmegen, The Netherlands, phone: +31(0)243616850, e-mail:  
10 marco.aben@radboudumc.nl, l.kamminga@science.ru.nl, <sup>3</sup>Radboud University, Faculty of Science,  
11 Department of Animal Ecology and Physiology, P.O. Box 9010, 6500 GL Nijmegen, The Netherlands,  
12 phone: +31(0)243653242, e-mail: g.flik@fnwi.ru.nl

13 <sup>†</sup>Current affiliation: Radboud University Medical Center, Department of Human Genetics, P.O. Box 9101,  
14 6500 HB Nijmegen, The Netherlands, marco.aben@radboudumc.nl

15 \*Corresponding author

16

## 17 **AUTHOR CONTRIBUTIONS**

18 B.S. conceived and designed the methodology and performed the experiments, analyzed the data, and  
19 prepared figures. M.A. performed experiments. L.M.K. conceived and supervised the study, acquired  
20 funding, was responsible for project management. B.S., G.F., and L.M.K. wrote the manuscript. All  
21 authors reviewed the manuscript.

22

23 **ABSTRACT**

24 Epigenetic data obtained from whole zebrafish embryos or larvae may mask or dilute organ-specific  
25 information. Fluorescence activated cell sorting can diverge cells from their native state, and  
26 cryosections often yield insufficient material for molecular analysis. Here, we present a reproducible  
27 method for larval intestinal isolation at 5, 7, and 9 days post-fertilization, using the intestine-specific  
28 transgene *tgBAC(cldn15la:GFP)*. With tweezers, the intestine can be pulled out of the abdomen in one  
29 smooth motion. Upon removal of adhering tissues, intestines can be directly used for analyses. Each  
30 dissection takes 3-6 minutes per fish. We demonstrate that 10 and 25 dissected intestines yield enough  
31 material for RNA-sequencing and ChIP-sequencing, respectively. This method results in high quality, live  
32 material, suitable for many downstream applications.

33

34 **METHOD SUMMARY**

35 We present a reproducible method for zebrafish larval intestinal isolation which results in high quality,  
36 live material. With tweezers, the intestine can be pulled out of the abdomen and after removal of  
37 adhering tissues, intestines can be directly used for analyses. We demonstrate that 10 and 25 dissected  
38 intestines yield enough material for RNA-sequencing and ChIP-sequencing, respectively.

## 39 INTRODUCTION

40 Genetic and epigenetic studies on zebrafish embryos and larvae require different, stage-dependent  
41 approaches. Whole embryo lysates are commonly used for studies on gene expression and epigenetics  
42 during early embryonic development [1–3]. However, as tissues and organs are specified, information  
43 originating from a defined tissue may mask another and signals may ‘dilute’. To eliminate noise and  
44 increase reliability, isolation of specific tissues or cells of an organ becomes mandatory.

45 To obtain organ-specific information for whole genome (DNA) or transcriptome (RNA) analysis,  
46 tissues can be dispersed and the cells sorted by fluorescence activated cell sorting (FACS) [4]. FACS  
47 enables the collection of specifically labeled living (single) cell populations out of a whole tissue or  
48 organism. It is a broadly applied method, for instance for blood cell subtyping [5]. However, cell surface  
49 markers might behave differently in single cell suspensions and might be cleaved by proteases (*e.g.*  
50 Trypsin) [6]. In zebrafish, unlike mammals, there is limited availability for commercial antibodies for cell  
51 surface markers, therefore, FACS is commonly used with transgenic lines which express tissue-specific  
52 fluorescent proteins. Cells obtained by FACS can then be pooled for DNA (chromatin), RNA, protein  
53 extraction, or separated for single cell studies [7]. Long preparation times, however, decrease cellular  
54 yield [8] and lead to anoikis (*i.e.* apoptosis caused by absence of cellular contacts) [9]. Importantly, single  
55 cells from dissociated tissues may undergo transcriptional changes, including immediate early response  
56 gene activation (*e.g. fos, jun, hsp* gene variants) [10] and further alterations in cell signaling pathways  
57 [11]. These alterations in dissociated cells can also cause dedifferentiation [12].

58 As an alternative to FACS, transcriptome of serial (cryo)sections of whole zebrafish embryos can  
59 be sequenced to generate a gene expression map (*e.g.* by Tomo-seq [13]). However, (cryo)sectioning  
60 may also cause alterations from native cellular conditions. To assess gene expression in only a subset of  
61 cells, cells can be extracted from tissue sections by carbon dioxide laser capture microdissection [14].  
62 These methods are limited to RNA- and DNA-sequencing; a (part of a) single embryo or larva is currently

63 insufficient for chromatin immunoprecipitation with commercially available antibodies, independent of  
64 the stage of (early) development [15].

65 Dissection of organs is a common procedure in studies on adult zebrafish [16], while embryonic  
66 and larval dissection studies are uncommon or not well-described. The embryonic heart is the most  
67 commonly dissected organ due to its peripheral position in the body, and the broad research interest in  
68 its regenerative capacity [17-21]. The zebrafish pronephros, precursor of kidney tissue among others, is  
69 another organ which has been dissected at 5 days post-fertilization (dpf) to study gene expression by  
70 real-time quantitative PCR [22]. Zebrafish intestine is of great interest due to its rapid development,  
71 renewal potential, and its function in supplying nutrients to the larvae after yolk depletion. A number of  
72 laboratories have documented intestinal dissections, however, either the dissection method used has  
73 not been explained in detail, or the subsequent technical analysis did not require a pure intestine [23-  
74 26]. Therefore, we investigated the feasibility of intestinal dissections in zebrafish larvae.

75 Zebrafish intestinal development begins with the appearance of an array of endodermal  
76 epithelial cells along the ventral midline of the embryo between 1-2 dpf [27]. This array of cells gradually  
77 forms a single, continuous lumen by the hollowing and subsequent fusion of several small lumina  
78 between 2-3 dpf [28]. During intestinal lumen formation, the liver and pancreas 'Anlagen' differentiate at  
79 the junction between the esophagus and the intestine and go through extensive remodeling and  
80 proliferation [27]. Zebrafish is a stomachless species, and its intestine is clearly separated into three  
81 parts: intestinal bulb, mid-intestine, and posterior intestine. By 5 dpf, the intestine becomes functional  
82 with the opening of the mouth and anus, when most yolk is absorbed and the larva starts feeding  
83 exogenously. To understand the regulatory processes in such a rapidly developing organ, the analysis of  
84 different time-points becomes necessary. Throughout the second week of development, different  
85 epithelial cell subtypes, namely enterocytes, goblet cells, enteroendocrine cells, and specialized antigen  
86 presenting (NaPi+) enterocytes (in order of abundance) continue to differentiate [29,30]. With the

87 growth of the intestine, this anterior loop folds into a sigmoid shape by adulthood [31]. Although the  
88 zebrafish intestinal lining (an epithelium very rich in enterocytes) is very similar in structure to that of  
89 mammals, it has ridges instead of villi. Proliferation, like in mammals in the crypts, predominantly occurs  
90 at the base of these ridges [30].

91 We present a rapid and reproducible method of dissection of larval zebrafish intestine with the  
92 aid of the intestine-specific transgenic line *tgBAC(cldn15la:GFP)*, which expresses the GFP-tagged protein  
93 'claudin 15-like a', an integral protein in the tight junctions of the intestinal epithelium [28]. We show  
94 that this technique is compatible with methods such as RNA- and ChIP-sequencing, and surpasses the  
95 efficiency of FACS of intestinal cells in the larval stages of this transgenic line.

## 96 **MATERIALS AND METHODS**

97

### 98 **Zebrafish strains and husbandry**

99 Transgenic lines *tgBAC(cldn15la:GFP)* [28] and *tg(gut:GFP)* [32] were used for GFP expression in the  
100 intestine. Embryos were raised in E3 embryo medium at 28.5°C as described in detail elsewhere [33].  
101 GFP expression was checked at 3-5 dpf under light anesthesia in 2-phenoxyethanol (0.05% v/v). Larvae  
102 were fed twice daily with dry feed (Gemma Micro 75, Skretting), rotifers, and artemia according to  
103 guidelines [33,34]. All experiments described are in accordance with institutional animal welfare  
104 guidelines, policies, and laws, and were approved after ethical testing by Central Committee for Animal  
105 Experimentation (CCD, approval number AVD1030020184668) of the Netherlands.

106

### 107 **Fluorescence Activated Cell Sorting**

108 Two hundred 5, 7 or 9 dpf larvae in the *tg(gut:GFP)* or *tgBAC(cldn15la:GFP)* background were  
109 anesthetized, divided into 1.5 ml microcentrifuge tubes (20 larvae per tube), and washed with PBS. The  
110 larvae were dissociated in 0.25% w/v Trypsin (Sigma), 1 mM EDTA in PBS at 28.5°C for 50-70 minutes.  
111 After trypsinization was stopped with 1 mM CaCl<sub>2</sub> and 100 µl 100% FBS, the suspension was passed  
112 through a FACS filter (BD, 70 µm) and clarified with Dnase I (100 µg/ml). Finally, the suspension was  
113 washed two times in PBS/1 mM EDTA solution and stained with 7-Aminoactinomycin D (7-AAD, Thermo  
114 Fisher) for cell viability. GFP-positive cells were sorted by BD FACS-Aria into TRIzol (Thermo Fisher).

115

### 116 **Dissection**

117 A Petri dish lid was positioned under a fluorescence stereo microscope (Leica MZ FLIII) as a working  
118 surface. During all steps, light microscopy and fluorescent microscopy were combined. Up to 4  
119 *tgBAC(cldn15la:GFP)* larvae of 5, 7, or 9 dpf were placed in 2-phenoxyethanol (0.05% v/v) for anesthesia

120 and processed within 30 minutes following loss of startle response. One larva was transferred under the  
121 microscope in 3-4 ml anesthesia medium, facing the dominant hand of the researcher. With one clean  
122 watchmaker's tweezer, the larva was pierced rostrally to the intestine behind the branchial arches and  
123 the intestine was clamped. At the same time, the fish was stabilized by pinching the swim bladder with  
124 another watchmaker's tweezer (Figure 1A and 1A'). Next, in one movement, the intestinal tract was  
125 carefully and slowly pulled out in the direction of the head; *i.e.* held by the distal segment and pulled  
126 towards the head of the fish (Figure 1B and 1B'). The intestinal tract was bisected at the transition  
127 between the esophagus and the intestine, and the carcass was discarded or lysed for genotyping (Figure  
128 1C and 1C'). The intestine was cleaned up under the microscope in fresh medium (Figure 1D and 1D'). In  
129 5 dpf larvae, yolk remnants were removed. At all time points, the swim bladder was pinched off with  
130 tweezers. Then, with tweezers and a microsurgical blade, liver and pancreas connections were cut off to  
131 free the intestine. Remnants of muscles were peeled off with tweezers. The intestine was double-  
132 checked for remaining adhering tissues (*e.g.* the autofluorescent gallbladder). The pure intestine was  
133 washed in clean system water, and then transferred into a 1.5 ml microcentrifuge tube with a Pasteur  
134 pipette. The working surface was frequently refreshed. After dissection, a maximum of 15 intestines  
135 were pooled on ice to prevent tissue damage before processing.

136

### 137 **RNA isolation**

138 Microcentrifuge tubes (1.5 ml) were filled with 100 or 500  $\mu$ l TRIzol for 1 or 10 intestines, respectively.  
139 Cells sorted by FACS were collected into 500  $\mu$ l TRIzol. Dissected intestines were transferred with a  
140 Pasteur pipette onto the lid of the tubes with a minimum volume of system water, and promptly shaken  
141 in TRIzol for lysis. RNA was isolated as described elsewhere [35]. After phase separation, in-column  
142 DNase I treatment was performed (ZYMO Quick-RNA MicroPrep). Total RNA yield was measured by  
143 fluorometric quantification (Qubit).

144 **Chromatin immunoprecipitation**

145 To prevent adsorption of dissected intestines to the tubes, microcentrifuge tubes (1.5 ml) were coated  
146 with 5% (w/v) BSA (Sigma) solution [36] for 15 minutes and dried. Thirty dissected intestines were cross-  
147 linked in 1% paraformaldehyde (Electron Microscopy Sciences) for 15 minutes. The reaction was  
148 quenched with 125 mM glycine for 5 minutes, and washed 3 times with PBS. The intestines were lysed  
149 (20 mM Tris-Cl pH 7.5, 70 mM KCl, 1 mM EDTA, 10% glycerol, 0.125% NP40, protease inhibitor cocktail  
150 [Roche]) and sonicated (6 cycles of 30 seconds, Bioraptor® Pico) to extract ~200 bp chromatin fragments.  
151 The chromatin was bound to protein A/G beads (Invitrogen, 1003D), incubated with anti-H3K4me3  
152 (Millipore, 2 µg) or anti-H3K27me3 (Millipore, 2 µg) antibodies overnight, then eluted off the beads.  
153 Input DNA concentration (1:6 fraction of total) and ChIP yield (5:6 fraction) was measured by  
154 fluorometric quantification (Qubit).



155 **RESULTS AND DISCUSSION**

156 In zebrafish, the intestine, which is the sole deliverer of energy (feed) to the animal, develops very  
157 quickly and throughout early larval stages. The organization of the intestine at that moment is  
158 comparable to the adult situation. Zebrafish intestinal anatomy is functionally comparable to the  
159 anatomy of most higher vertebrates [27]. Zebrafish intestinal epithelium is organized in ridges with  
160 somewhat larger dimensions compared to mammalian villus-crypts [30]. Proliferative regulation is  
161 similar, *e.g.* with a crucial role for Wnt signaling, which appears conserved from zebrafish to mammals  
162 [37,38]. Therefore, the zebrafish intestine is an attractive translational model to study human diseases  
163 [39] and for fundamental research on (epi)genetic regulation [1]. For these reasons, we aimed to isolate  
164 the intestine from larval stages. This study combines zebrafish developmental physiology with molecular  
165 biology and demonstrates a highly feasible technique to dissect the intestinal tract of zebrafish larvae in  
166 the *tgBAC(cldn15la:GFP)* transgenic background. It further presents yield of RNA extraction and  
167 chromatin immunoprecipitation from intestines, and shows that the total RNA yield from dissected  
168 intestine surpasses that of FACS-samples by at least 4-fold in our hands. Here we will discuss the  
169 rationale behind the development, advantages, and disadvantages of this method.

170

171 **Fluorescence Activated Cell Sorting (FACS)**

172 To study zebrafish intestinal (epi)genetics during the first days of larval development, we used two  
173 previously described transgenic lines, *tg(gut:GFP)* [32] and *tgBAC(cldn15la:GFP)* [28]. The rationale was  
174 that from these transgenes cell suspensions could be made, from which intestinal cells could be isolated  
175 by FACS for further molecular analyses. The isolation of cells from both of these lines prior to FACS  
176 analysis presented challenges. Preparation of isolated cell suspensions from whole larvae took over 2  
177 hours, during which cell viability decreased to 60%. GFP-positive and negative cells did not present a  
178 distinct boundary to set reliable gates for sorting. The percentage of GFP-positive cells obtained from 5

179 dpf larvae was as low as 0.1% for *tg(gut:GFP)* (Figure 2A), and 1.9% for *tgBAC(cldn15la:GFP)* (Figure 2B).  
180 As the *tg(gut:GFP)* line also expresses the construct in the liver and pancreas and gave such low FACS  
181 yield, we decided to continue our research with the *tgBAC(cldn15la:GFP)* line.

182 Cell dissociation for FACS is a rigorous process for cells due to the stress of enzymatic digestion  
183 and trituration. Hard and soft tissues require different durations to dissociate, and the timing of  
184 complete dissociation changes according to the age of embryos/larvae. During cell dissociation, some  
185 cell death occurs and the viscous texture of genomic DNA in solution may encumber pipetting. As  
186 mentioned before, changes might occur in transcription, cell signaling pathways, and the differentiation  
187 status of the cells [10-12].

188

### 189 **Intestinal dissection**

190 Next, we investigated whether segmenting the larvae into smaller parts prior to single cell preparations  
191 would increase the FACS yield and reduce noise from auto-fluorescence. For this inquiry, we attempted  
192 dissections on larval intestines in the *tgBAC(cldn15la:GFP)* background. Remarkably, these dissections  
193 were very consistent and time efficient. Moreover, the reduction of material processed per zebrafish  
194 greatly reduced the trypsinization time as well; approximately by half. Nonetheless, the FACS yield of this  
195 semi-pure population of GFP-positive cells was only 8.9% at 9 dpf (Figure 2C, Supplementary Figure 1).  
196 Due to this (unexpected) low yield, we concluded that *tgBAC(cldn15la:GFP)* is an unsuitable model for  
197 FACS. However, it could serve as a great tool for obtaining intestine-specific cells through dissections.

198 Dissection of the intestine resulted in minimal tissue damage due to the short processing time  
199 (3-6 minutes per fish) required. To prevent loss of sample quality and to obtain intestines in a  
200 comparable developmental stage per batch, we limited handling time to 60 minutes, or 15 larvae, before  
201 lysis or fixation. During dissection, the integrity of the intestine was visualized in real-time by microscopy.  
202 This allows possible (mutant) intestinal phenotypes or technical errors in dissection to be observed

203 under the microscope. Moreover, the carcass from each larva can be genotyped, and any single  
204 unsuitable sample can be discarded before intestinal pooling.

205 During dissection optimizations, sliding the intestine out of the body in rostrocaudal direction  
206 proved to be the simplest, fastest, and the most reproducible method. Each intestine took 3 to 6 minutes  
207 to collect, mainly depending on the age of the larva (and the experience of the researcher); older larvae  
208 could be dissected in shorter time. Once the intestines were out of the larvae, non-intestinal tissues  
209 were removed under fluorescent and light microscopy. This reproducible purification of intestinal  
210 epithelium proved to be an excellent start for molecular analysis, as opposed to a mix of tissues in whole  
211 larvae.

212 During the development of the technique, several aspects of the protocol needed to be  
213 considered for optimal results. To manipulate larvae easily under the microscope and to minimize light  
214 refraction, the system water on the working surface (petri dish lid/cover) was set between 3-4 ml. To  
215 prevent the adherence of intestines to plastic, glass Pasteur pipettes were used for transfer of intestines,  
216 and BSA coating was chosen over the rather costly and inefficient use of dichlorodimethylsilane coating  
217 or low binding microcentrifuge tubes. Bovine serum albumin (BSA) is a protein commonly used for  
218 blocking Western blot membranes and ChIP beads, but also for coating laboratory equipment against  
219 adherence of materials [40].

220 Intestinal dissections can be considered as a difficult process prone to errors and variation.  
221 Between 5-9 dpf, the length of the larvae is between 3.9-4.5 mm, which requires the use of a microscope  
222 and watchmaker's tweezers. For the tissue to stay intact and unchanged from the start of the dissection  
223 to tissue lysis/fixation, the researcher needs to act fast and gentle at the same time. Individual variation  
224 in physiology [41] also needs to be considered for analysis of multiple fish.

225 In addition to individual differences, time point differences also unavoidably vary the dissection  
226 procedure. Because the intestinal tissue is still soft and elastic at 5 dpf [34], it is more likely to tear

227 between the intestinal bulb and mid-intestine during the removal of the intestine from the body. The  
228 muscles are the most challenging extra-intestinal tissue to remove at 5 dpf due to the fragility of the  
229 intestine and the thinness of the muscle lining. By 7 dpf, the intestine has hardened enough such that  
230 muscle, liver, and pancreas can be swiftly peeled/cut off of the intestine with the help of tweezers and  
231 microsurgical blades.

232 Further, the procedure is potentially prone to contamination with liver, pancreas, muscle, and  
233 gallbladder. At 5 dpf, yolk contamination is also an additional risk. Therefore, at least 6 biological  
234 replicates should be used if the extracted RNA will be used for sequencing [42]. For ChIP-sequencing,  
235 more than two replicates are recommended to minimize errors in bioinformatics analysis [43]. Another  
236 aspect of sample variation is the presence of four different epithelial cell types and three different  
237 morphological segments within the intestine [29,30], with different functional properties [31]. It is a  
238 coherent presumption that these different functions start developing before or during larval stages.

239

#### 240 **RNA isolation and chromatin immunoprecipitation**

241 We used dissected intestines for RNA isolation and chromatin immunoprecipitation. At all time points,  
242 total RNA obtained by single intestines (average: 28.4 ng) and pools of 10 intestines (average: 343 ng)  
243 was proportional to the number of larvae (Table 1). Surprisingly, FACS on intestinal cells at 9 dpf from 20  
244 larvae yielded a proportionally >4-fold lower amount of total RNA than dissected intestines (Table 1).  
245 The amount of RNA from dissected pooled intestines suffices as input for RNA-sequencing (Ribo-Zero  
246 rRNA Removal Kit, Illumina) for all developmental time points used.

247 To immunoprecipitate intestinal chromatin, we collected intestines in a BSA-coated  
248 microcentrifuge tube. Immunoprecipitation of chromatin from 25 pooled intestines with anti-H3K4me3  
249 and anti-H3K27me3 antibodies yielded sufficient starting material for Illumina sequencing preparation;  
250 on average 6.3 ng and 12.8 ng chromatin was immunoprecipitated with anti-H3K4me3 and anti-

251 H3K27me3, respectively (Table 2). We have used total RNA and chromatin from pooled zebrafish larval  
252 intestines to analyze the wild type intestinal transcriptome and the presence of H3K4me3 and  
253 H3K27me3 chromatin marks on gene promoters at 5, 7, and 9 dpf [44]. To detect individual variation,  
254 single intestines should be processed with available low input protocols [45-47]. However, low-input  
255 ChIP yields still predominantly depend on the antibody efficiency, and the methods are costly for many  
256 [48].

257         Although dissected intestines are a far better model than whole larvae for molecular and  
258 biochemical analysis of the intestine, we recommend additional validation experiments such as staining  
259 of individual mRNA or proteins to assess their localization. Additionally, dissected intestines can be used  
260 for protein isolation and subsequent proteomics. In summary, intestinal dissection serves as an excellent  
261 tool to compare differences in this rapidly developing organ between larval stages, and between wild  
262 types and mutants.

263 **ACKNOWLEDGEMENTS**

264 The authors would like to thank Tom Spanings and Antoon van der Horst of Radboud University for  
265 zebrafish husbandry, Rob Woestenenk of the Radboud University Medical Center for FACS assistance,  
266 Cornelia Veelken of the Radboud Institute for Molecular Life Sciences for sharing the FACS protocol,  
267 Karolina Andralojc of the Radboud University for discussions on BSA-coating, Silvia Boj of the Hubrecht  
268 Institute for the *tg(gut:GFP)* line, Ashley Alvers Lento and Michel Bagnat of Duke University for providing  
269 the *tgBAC(cldn15la:GFP)* line.

270

271 **REFERENCES**

- 272 1. Lindeman LC, Andersen IS, Reiner AH, *et al.* Prepatterning of developmental gene expression by  
273 modified histones before zygotic genome activation. *Dev Cell.* 21(6):993–1004 (2004).
- 274 2. Vastenhouw NL, Zhang Y, Woods IG, *et al.* Chromatin signature of embryonic pluripotency is  
275 established during genome activation. *Nature.* 464(7290):922–6 (2010).
- 276 3. Kaaij LJT, Mokry M, Zhou M, *et al.* Enhancers reside in a unique epigenetic environment during early  
277 zebrafish development. *Genome Biology.* 17(1):146 (2016).
- 278 4. Sugiyama, T., Kim, S.K. Fluorescence-activated cell sorting purification of pancreatic progenitor cells.  
279 *Diabetes Obes Metab.* 10(Suppl 4):179-85 (2008).
- 280 5. Herzenberg LA, Parks D, Sahaf B, Perez O, Roederer M, Herzenberg LA. The History and Future of the  
281 Fluorescence Activated Cell Sorter and Flow Cytometry: A View from Stanford. *Clinical Chemistry,*  
282 48(10):1819-1827 (2002).
- 283 6. Besingi RN, Clark PL. Extracellular Protease Digestion to Evaluate Membrane Protein Cell Surface  
284 Localization. *Nature Protocols.* 10(12):2074–2080 (2015).
- 285 7. Grün, D., van Oudenaarden, A. Design and Analysis of Single-Cell Sequencing Experiments. *Cell.*  
286 163(4):799–810 (2015).
- 287 8. Chang JP, Jobin RM: Teleost pituitary cells: isolation, culture and use. Analytical techniques (pp. 207).  
288 Elsevier, Amsterdam, The Netherlands (1994).
- 289 9. Zhao B, Li L, Wang L, *et al.* Cell detachment activates the Hippo pathway via cytoskeleton  
290 reorganization to induce anoikis. *Genes & Development,* 26(1):54–68 (2012).

- 291 10. van den Brink SC, Sage F, Vértesy Á, *et al.* Single-cell sequencing reveals dissociation-induced gene  
292 expression in tissue subpopulations. *Nat Methods*. 14(10):935–936 (2017).
- 293 11. Geller SF, Lewis GP, Fisher SK. FGFR1, signaling, and AP-1 expression after retinal detachment:  
294 reactive Müller and RPE cells. *Invest Ophthalmol Vis Sci*. 42(6):1363–9 (2001).
- 295 12. Minami K, Okano H, Okumachi A, Seino S. Role of cadherin-mediated cell-cell adhesion in pancreatic  
296 exocrine-to-endocrine transdifferentiation. *J Biol Chem*. 283(20):13753–61 (2008).
- 297 13. Kruse F, Junker JP, van Oudenaarden A, Bakkers J. Tomo-seq: A method to obtain genome-wide  
298 expression data with spatial resolution, *Methods in Cell Biology*, 135:299–307 (2016).
- 299 14. Emmert-Buck MR, Bonner RF, Smith PD, *et al.* Laser capture microdissection. *Science*. 274(5289):998–  
300 1001 (1996).
- 301 15. Crosetto N, Bienko M, van Oudenaarden A. Spatially resolved transcriptomics and beyond. *Nat Rev*  
302 *Genet*. 16(1):57–66 (2015).
- 303 16. Gupta T, Mullins MC. Dissection of Organs from the Adult Zebrafish. *JoVE*, 37(3):1717 (2010).
- 304 17. Kikuchi K. Advances in understanding the mechanism of zebrafish heart regeneration. *Stem Cell Res*.  
305 13(3 Pt B):542–55 (2014).
- 306 18. Noël ES, Verhoeven M, Lagendijk AK, *et al.* A Nodal-independent and tissue-intrinsic mechanism  
307 controls heart-looping chirality. *Nat Commun*. 4:2754 (2013).
- 308 19. Burns CG, MacRae CA. Purification of hearts from zebrafish embryos. *BioTechniques*, 40(3):278–282  
309 (2006).



- 310 20. Singleman C, Holtzman NG. Heart Dissection in Larval, Juvenile and Adult Zebrafish, *Danio rerio*. *JoVE*,  
311 55(9):3165 (2011).
- 312 21. Lombardo VA, Otten C, Abdelilah-Seyfried S. Large-scale Zebrafish Embryonic Heart Dissection for  
313 Transcriptional Analysis. *JoVE*, 95(1):52087 (2015).
- 314 22. Corre T, Arjona FJ, Hayward C *et al.* Genome-Wide Meta-Analysis Unravels Interactions between  
315 Magnesium Homeostasis and Metabolic Phenotypes. *J Am Soc Nephrol*. 29(1):335-348 (2017).
- 316 23. Enya S, Kawakami K, Suzuki Y, Kawaoka S. A novel zebrafish intestinal tumor model reveals a role for  
317 *cyp7a1*-dependent tumor-liver crosstalk in causing adverse effects on the host. *Disease models &*  
318 *mechanisms*, 11(8),pii:dmm032383 (2018).
- 319 24. Rolig AS, Parthasarathy R, Burns AR, Bohannan BJ, Guillemin K. Individual Members of the Microbiota  
320 Disproportionately Modulate Host Innate Immune Responses. *Cell host & microbe*, 18(5):613-20 (2015).
- 321 25. Clifton JD, Lucumi E, Myers MC, *et al.* Identification of novel inhibitors of dietary lipid absorption  
322 using zebrafish. *PloS one*, 5(8):e12386 (2010).
- 323 26. Simonson LW, Ganz J, Melancon E, Eisen JS. Characterization of enteric neurons in wild-type and  
324 mutant zebrafish using semi-automated cell counting and co-expression analysis. *Zebrafish*, 10(2):147-53  
325 (2013).
- 326 27. Wallace KN, Pack M. Unique and conserved aspects of gut development in zebrafish. *Dev Biol*.  
327 255(1):12–29 (2003).
- 328 28. Alvers AL, Ryan S, Scherz PJ, Huisken J, Bagnat M. Single continuous lumen formation in the zebrafish  
329 gut is mediated by smoothed-dependent tissue remodeling. *Development*, 141(5):1110–1119 (2014).

- 330 29. Ng AN, de Jong-Curtain TA, Mawdsley DJ, *et al.* Formation of the digestive system in zebrafish: III.  
331 Intestinal epithelium morphogenesis, *Developmental Biology*, 286(1):114–135 (2005).
- 332 30. Wallace KN, Akhter S, Smith EM, Lorent K, Pack M. Intestinal growth and differentiation in zebrafish.  
333 *Mechanisms of Development*, 122(2):157–173 (2005).
- 334 31. Wang Z, Du J, Lam SH, Mathavan S, Matsudaira P, Gong Z. Morphological and molecular evidence for  
335 functional organization along the rostrocaudal axis of the adult zebrafish intestine. *BMC Genomics*,  
336 11:392 (2010).
- 337 32. Field HA, Ober EA, Roeser T, Stainier DY. Formation of the digestive system in zebrafish. I. liver  
338 morphogenesis, *Developmental Biology*, 253(2):279–290 (2003).
- 339 33. Westerfield, M: The zebrafish book, A guide for the laboratory use of zebrafish (*Danio rerio*), 5th ed.,  
340 University of Oregon Press, Eugene, Oregon, the United States of America (2007).
- 341 34. Wilson C. Aspects of larval rearing. *ILAR J.* 53(2):169–78 (2012).
- 342 35. Chomczynski P. A reagent for the single-step simultaneous isolation of RNA, DNA and proteins from  
343 cell and tissue samples. *BioTechniques*, 15(3):532–537 (1993).
- 344 36. Bratcher PE, Gaggari A. Characterization and Prevention of the Adsorption of Surfactant Protein D to  
345 Polypropylene. *PLoS ONE*, 8(9):e73467 (2013).
- 346 37. Cheesman SE, Neal JT, Mittge E, Seredick BM, Guillemin K. Epithelial cell proliferation in the  
347 developing zebrafish intestine is regulated by the Wnt pathway and microbial signaling via Myd88. *PNAS*.  
348 108(Suppl 1):4570–4577 (2011).
- 349 38. Muncan V, Faro A, Haramis A-PG *et al.* T-cell factor 4 (Tcf7l2) maintains proliferative compartments  
350 in zebrafish intestine. *EMBO Reports*. 8(10):966–973 (2007).

- 351 39. Lu J-W, Ho Y-J, Ciou S-C, Gong Z. Innovative Disease Model: Zebrafish as an In Vivo Platform for  
352 Intestinal Disorder and Tumors. *Biomedicines*, 5(4):58 (2017).
- 353 40. Man Y, Lv X, Iqbal J *et al.* Adsorptive BSA Coating Method for CE to Separate Basic Proteins  
354 *Chromatographia*. 76(1-2):59-65 (2013).
- 355 41. Field HA, Kelley KA, Martell L, Goldstein AM, Serluca FC. Analysis of gastrointestinal physiology using  
356 a novel intestinal transit assay in zebrafish. *Neurogastroenterology and Motility*. 21(3):304–12 (2009).
- 357 42. Schurch NJ, Schofield P, Gierliński M *et al.* How many biological replicates are needed in an RNA-seq  
358 experiment and which differential expression tool should you use? *RNA*, 22(6):839–851 (2016).
- 359 43. Yang Y, Fear J, Hu J *et al.* Leveraging biological replicates to improve analysis in ChIP-seq experiments.  
360 *Computational and Structural Biotechnology Journal*, 9:e201401002 (2014).
- 361 44. 48. San B, Aben M, Elurbe DM *et al.* Genetic and epigenetic regulation of zebrafish intestinal  
362 development. *Epigenomes*. 2(4):19 (2018).
- 363 45. Dahl JA, Gilfillan GD. How low can you go? Pushing the limits of low-input ChIP-seq. *Briefings in*  
364 *Functional Genomics*, 17(2):89–95 (2018).
- 365 46. Picelli S, Faridani OR, Björklund AK, Winberg G, Sagasser S, Sandberg R. Full-length RNA-seq from  
366 single cells using Smart-seq2. *Nature Protocols*. 9(1):171–81 (2014).
- 367 47. Hashimshony T, Wagner F, Sher N, Yanai I. CEL-Seq: single-cell RNA-Seq by multiplexed linear  
368 amplification. *Cell Reports*. 2(3):666–73 (2012).
- 369 48. Helmy M, Awad M, Mosa KA. Limited resources of genome sequencing in developing countries:  
370 Challenges and solutions. *Applied & Translational Genomics*. 9:15–19 (2016).

371

372 **FIGURE LEGENDS**

373 **Figure 1. FACS sorting in *tg(gut:GFP)* and *tg(cldn15la:GFP)*.** Single cell suspensions were prepared from  
374 5 dpf whole zebrafish larvae in the *tg(gut:GFP)* (**A**) and *tg(cldn15la:GFP)* (**B**) backgrounds. The GFP-  
375 positive populations (**A, B**, purple dots) were gated according to the GFP-negative population (**A, B**, black  
376 dots) and sorted into TRIzol for RNA extraction. **C.** FACS on whole *tg(gut:GFP)* and *tg(cldn15la:GFP)* larval  
377 suspensions at 5 dpf yielded 0.1% and 1.9% GFP-positive cells, respectively. Unexpectedly, FACS on  
378 dissected intestines from *tg(cldn15la:GFP)* yielded as low as 8.9% GFP-positive cells.

379  
380 **Figure 2. Dissection of the larval intestine.** Overview of the major steps during the dissection of a larval  
381 intestine; 5 dpf is shown as an example. The same steps are taken for 7 and 9 dpf. Left and right panels  
382 are the same field of view under light microscopy (**A, B, C, D**) and fluorescent microscopy (**A', B', C', D'**),  
383 respectively. **A, A'.** With the help of tweezers, the intestine was stabilized. **B, B'.** The intestine was slid  
384 out of the body in the direction of the head. **C, C'.** The extra-intestinal tissues were cleaned off by peeling  
385 or cropping by microsurgical blades. **D, D'.** The intestine was carefully checked for GFP purity and  
386 promptly transferred into a microcentrifuge tube.

387  
388 **Table 1. Total RNA yield.** Total RNA was isolated from single or a pool of 10 dissected intestines at 5, 7,  
389 and 9 dpf in triplicates, and the yield was quantified fluorometrically (Qubit). The average yield is shown  
390 in nanograms. FACS-sorted intestinal cells from 20 whole *tg(cldn15la:GFP)* larvae at 10 dpf yielded 4-fold  
391 less total RNA.

392  
393 **Table 2. Chromatin immunoprecipitation yield.** After chromatin extraction from 30 intestines at 5, 7, or  
394 9 dpf, samples were sonicated to obtain ~200 bp fragments, and one sixth of the DNA (~5 intestines) was  
395 separated to measure DNA input. The rest of the sample (five sixth, ~25 intestines) was subjected to anti-

396 H3K4me3 or anti-H3K27me3 immunoprecipitation in replicates, eluted off, and the yield was quantified  
397 fluorometrically (Qubit). The average ChIP yield is shown in nanograms.

398

399 **Supplemental Figure 1. FACS sorting in dissected *tg(cldn15la:GFP)* intestines.** Intestines of 10 dpf were  
400 crudely dissected from *tg(cldn15la:GFP)* larvae and single cell suspensions were prepared. GFP-negative  
401 population (left panel, red dots) was used to gate the GFP-positive population (right panel, red dots).  
402 GFP-positive population was calculated as 8.9%.

403

5 dpf *tg(cldn15la:GFP)* intestinal dissection

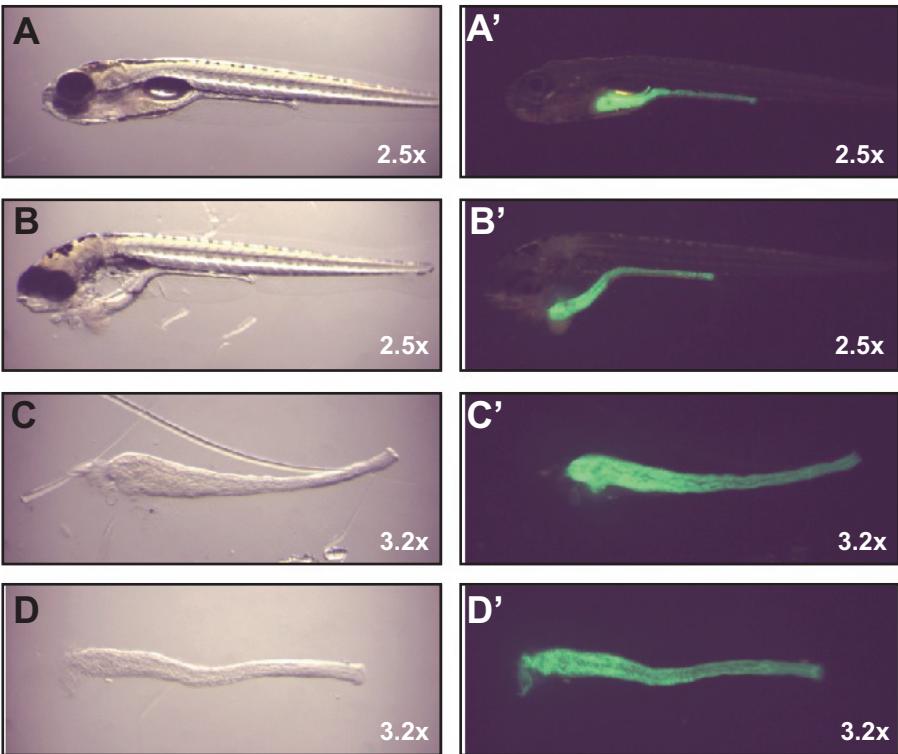

**Step 1:**

Clamp one tweezer rostral to the intestine, along the branchial arches  
Stabilize the larva by pinching the swim bladder with the other tweezer

**Step 2:**

Pull out the intestine and the connected tissues (liver, pancreas, swim bladder, gall bladder, muscle) in a smooth and gentle motion.

**Step 3:**

Using tweezers, peel off adjacent muscles.  
Using a surgical blade, cut off the extra-intestinal tissues.  
Using a pasteur pipette, transfer the intestine in a tube for downstream applications

**A**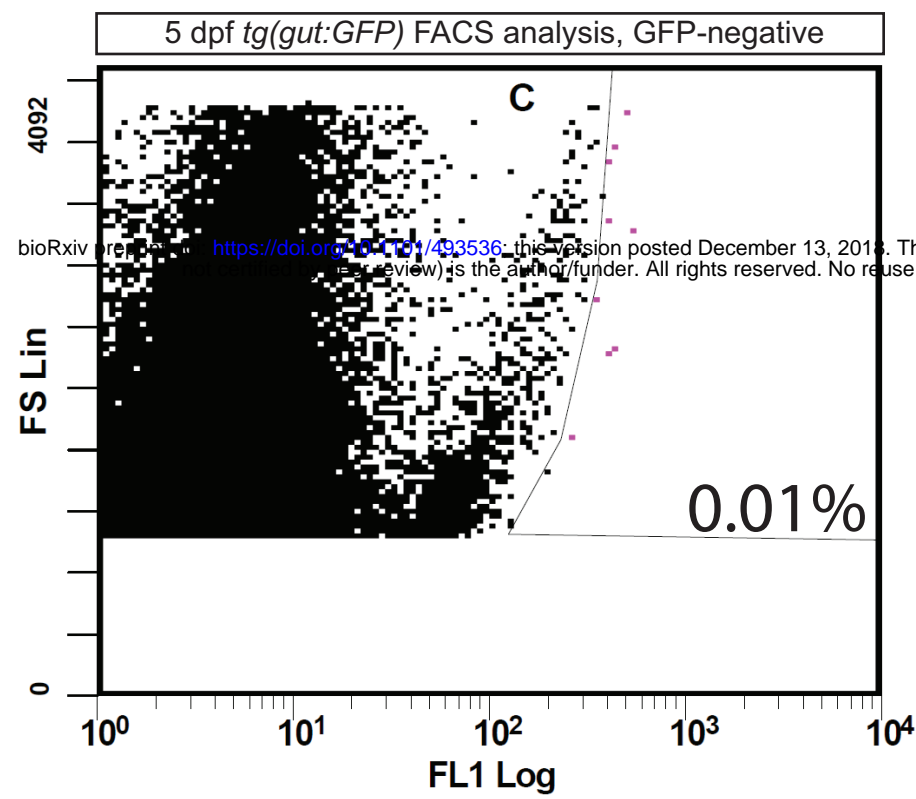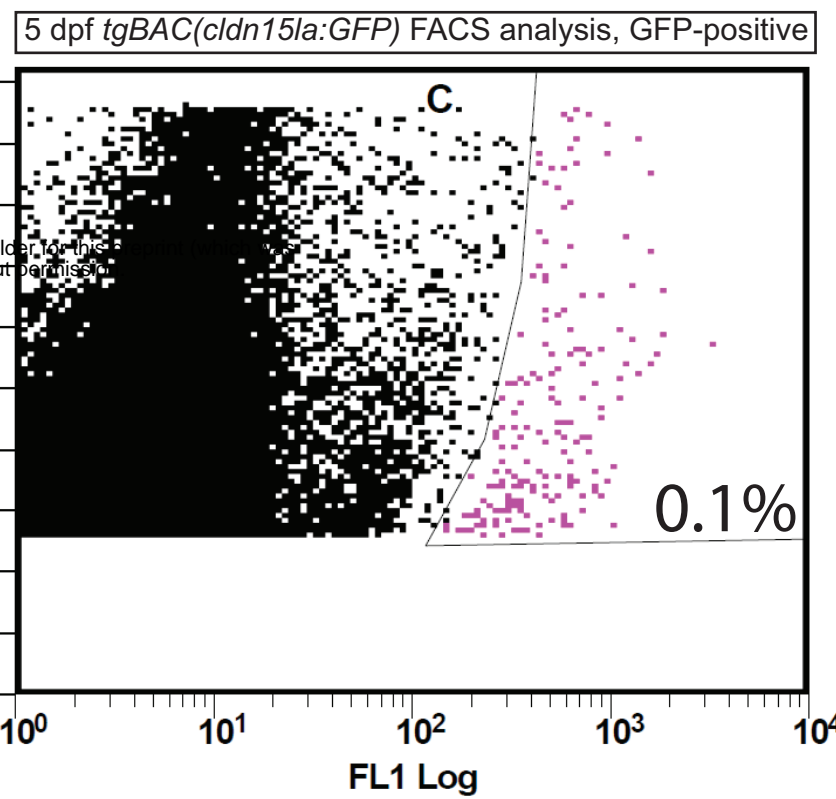**B**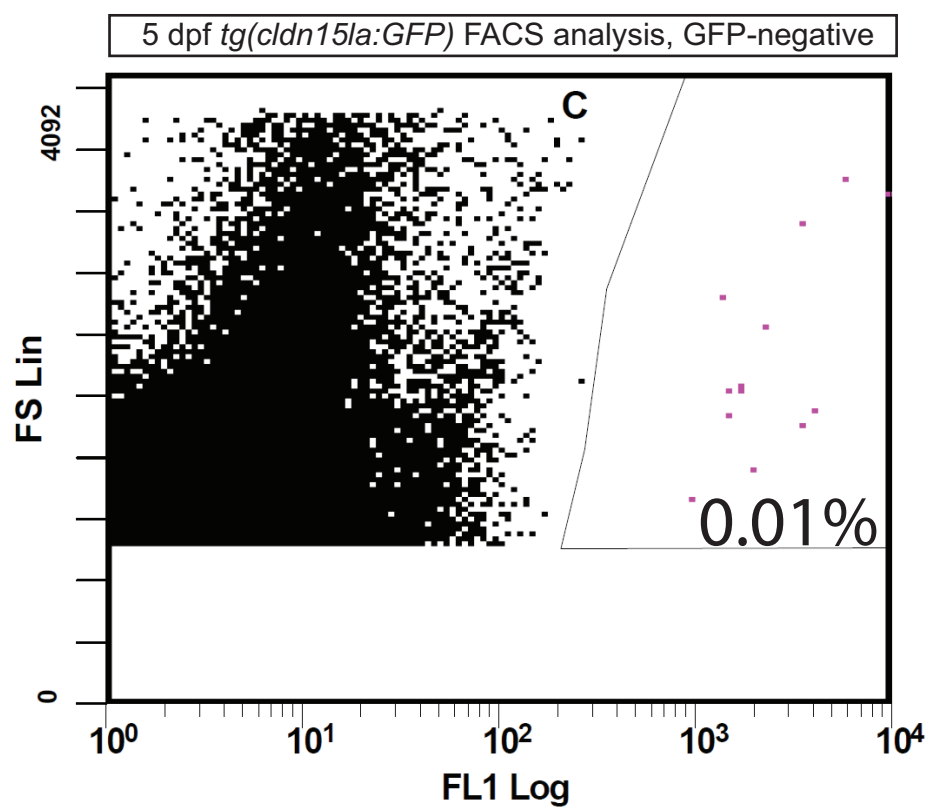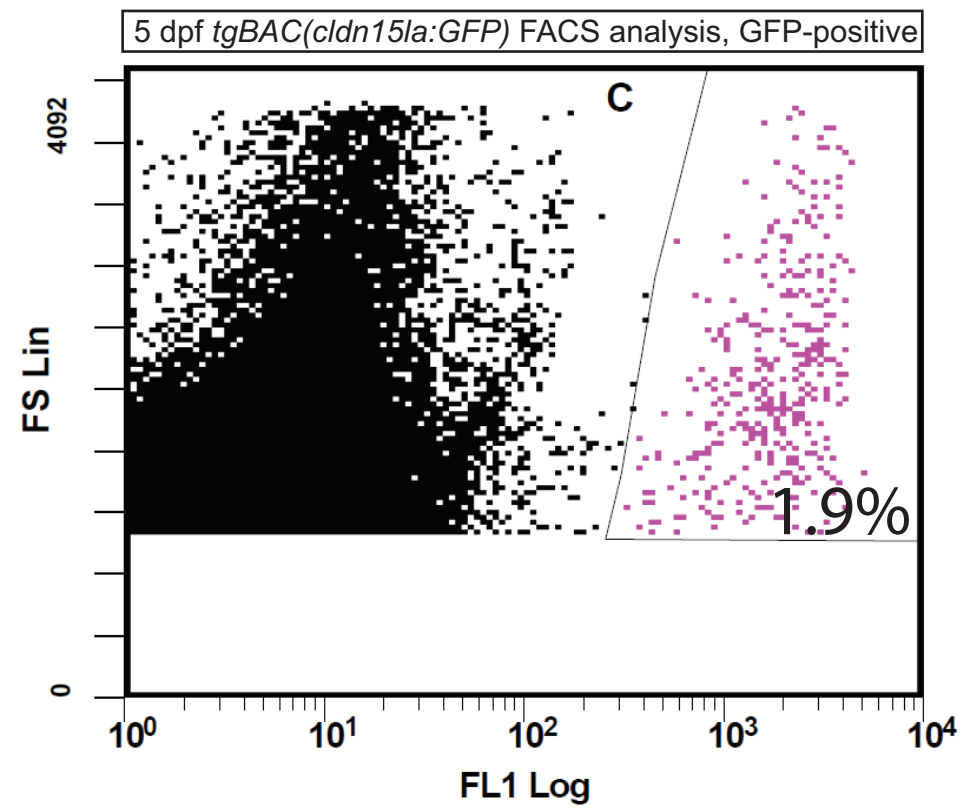**C**

|                                        | GFP+ percentage |
|----------------------------------------|-----------------|
| <i>tg(gut:GFP)</i> , whole             | 0.1%            |
| <i>tgBAC(cldn15la:GFP)</i> , whole     | 1.9%            |
| <i>tgBAC(cldn15la:GFP)</i> , dissected | 8.9%            |

**Table 1: Total RNA yield (ng)**

|                   | 5 dpf | 7 dpf | 9 dpf |
|-------------------|-------|-------|-------|
| Single intestines | 24.4  | 30.8  | 29.9  |
| 10 intestines     | 364.5 | 348   | 316.5 |
| FACS (20 larvae)  | N/A   | N/A   | 150   |



**Table 1: Total DNA yield from CHIP (ng)**

|               | 5 dpf | 7 dpf | 9 dpf |
|---------------|-------|-------|-------|
| anti-H3K4me3  | 8.4   | 6.4   | 4.2   |
| anti-H3K27me3 | 14.2  | 11.8  | 12.4  |
| Input         | 56.4  | 76.4  | 141.2 |
